# Supplementary material for: Occurrence, profiling and prioritization of halogenated disinfection by-products in drinking water of China
Source: Royal Society of Chemistry journal article supplement (doi:10.1039/c3em00110e), 2013-01-01
Supplement: c3em00110e.pdf [file c3em00110e.pdf]

Electronic Supplementary Information for  
Occurrence, Profiling and Prioritization of Halogenated Disinfection By-Products in  
Drinking Water of China

Huanhuan Ding,<sup>a</sup> Liping Meng,<sup>b</sup> Haifeng Zhang,<sup>a</sup> Jianwei Yu,<sup>a</sup> Wei An,<sup>a</sup> Jianying  
Hu<sup>b</sup> and Min Yang<sup>a\*</sup>

<sup>a</sup>State Key Laboratory of Environmental Aquatic Chemistry, Research Center for  
Eco-Environmental Sciences, Chinese Academy of Sciences, Beijing 100085, China

<sup>b</sup>College of Urban and Environmental Sciences, Peking University, Beijing 100871,  
China

Figure 1

Tables 8

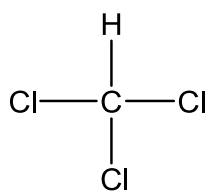

**TCM**

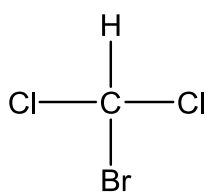

**DCBM**

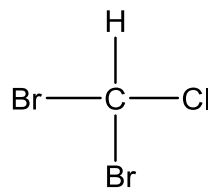

**DBCM**

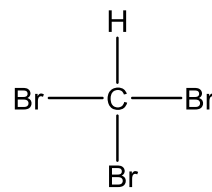

**TBM**

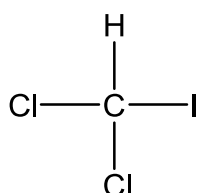

**DCIM**

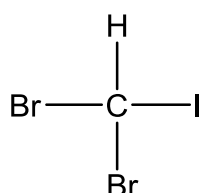

**DBIM**

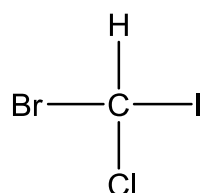

**BCIM**

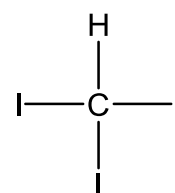

**TIM**

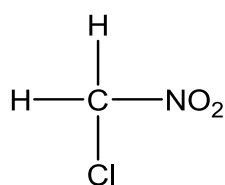

**CNM**

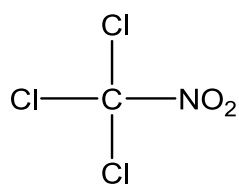

**TCNM**

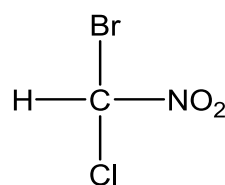

**BCNM**

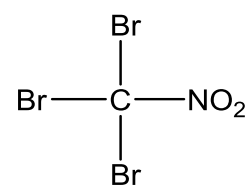

**TBNM**

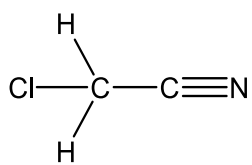

**CAN**

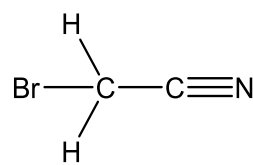

**BAN**

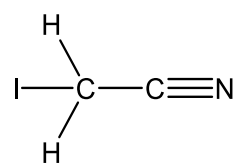

**IAN**

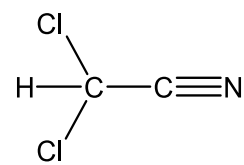

**DCAN**

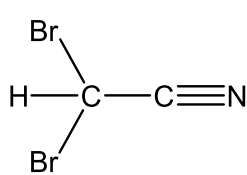

**DBAN**

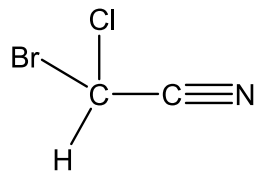

**BCAN**

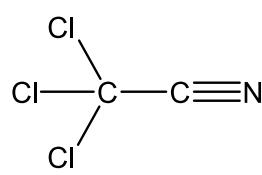

**TCAN**

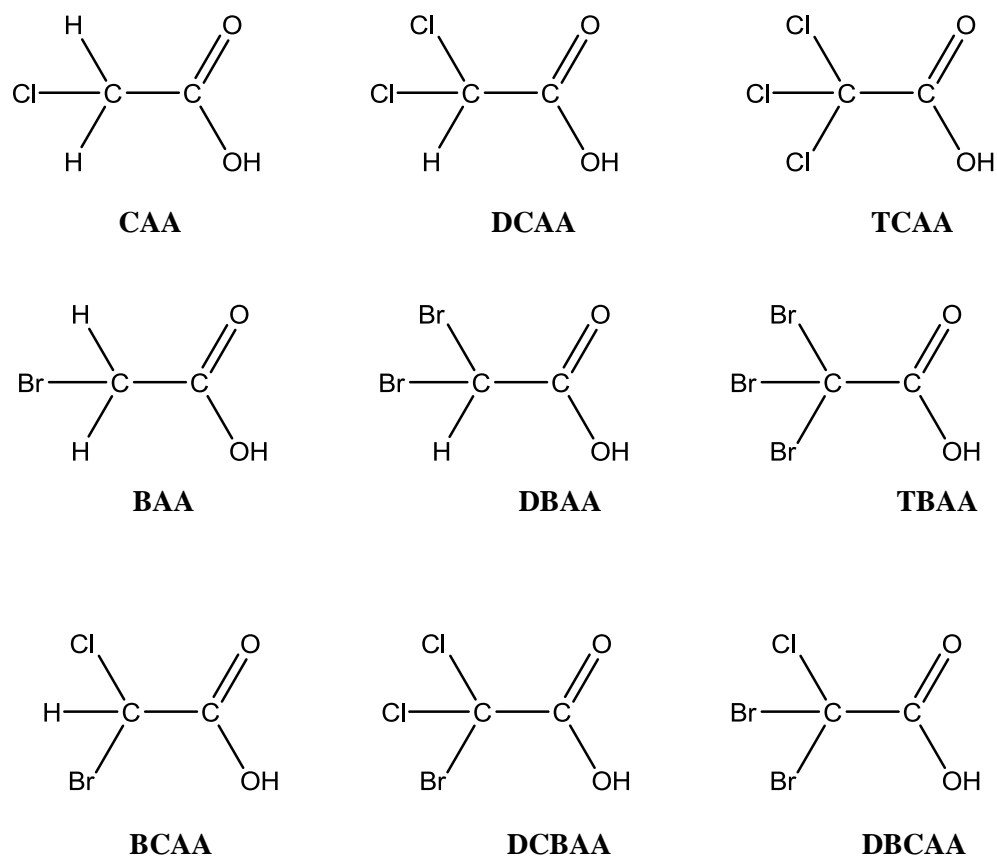

Figure S1. The structures and acronyms of target analytes.

Table S1. Limit of quantization (LOQs,  $\mu\text{g L}^{-1}$ ) and recoveries (n=3) of DBPs in drinking waters.

|                       | <b>Cmpound</b>           | <b>Acronym</b> | <b>LOQs<br/>(<math>\mu\text{g L}^{-1}</math>)</b> | <b>Recoveries<br/>(mean <math>\pm</math> RSD)</b> |
|-----------------------|--------------------------|----------------|---------------------------------------------------|---------------------------------------------------|
| <b>THM4</b>           | Chloroform               | TCM            | 0.2                                               | 105 $\pm$ 17.4                                    |
|                       | Bromodichloromethane     | BDCM           | 0.01                                              | 113 $\pm$ 8.0                                     |
|                       | Dibromochloromethane     | DBCM           | 0.03                                              | 102 $\pm$ 13.2                                    |
|                       | Bromofrom                | TBM            | 0.05                                              | 130 $\pm$ 12.7                                    |
| <b>Iodinated THMs</b> | Dichloriodomethane       | DCIM           | 0.1                                               | 111 $\pm$ 10.7                                    |
|                       | Bromochloriodomethane    | BCIM           | 0.1                                               | 114 $\pm$ 8.6                                     |
|                       | Dibromiodomethane        | DBIM           | 0.1                                               | 102 $\pm$ 11                                      |
|                       | Iodoform                 | TIM            | 0.1                                               | 91 $\pm$ 7.0                                      |
| <b>HAAs</b>           | Monochloroacetic acid    | CAA            | 2.08                                              | 80.8 $\pm$ 1.5                                    |
|                       | Dichloroacetic acid      | DCAA           | 0.45                                              | 97.0 $\pm$ 6.4                                    |
|                       | Trichloroacetic acid     | TCAA           | 1.09                                              | 101 $\pm$ 0.5                                     |
|                       | Monobromoacetic acid     | BAA            | 0.70                                              | 80.1 $\pm$ 1.1                                    |
|                       | Dibromoacetic acid       | DBAA           | 1.25                                              | 98.0 $\pm$ 3.9                                    |
|                       | Tribromoacetic acid      | TBAA           | 24.29                                             | 88.8 $\pm$ 0.6                                    |
|                       | Bromochloroacetic acid   | BCAA           | 0.56                                              | 101 $\pm$ 2.7                                     |
|                       | Bromodichloroacetic acid | BDCAA          | 3.10                                              | 98.3 $\pm$ 4.4                                    |
|                       | Chlorodibromoacetic acid | CDBAA          | 4.00                                              | 93.5 $\pm$ 13                                     |
|                       |                          |                |                                                   |                                                   |
| <b>HANs</b>           | Chloroacetonitrile       | CAN            | 0.02                                              | 71 $\pm$ 6.7                                      |
|                       | Dichloroacetonitrile     | DCAN           | 0.02                                              | 97 $\pm$ 7.5                                      |
|                       | Trichloroacetonitrile    | TCAN           | 0.01                                              | 97 $\pm$ 4.4                                      |
|                       | Bromoacetonitrile        | BAN            | 0.01                                              | 82 $\pm$ 12.8                                     |

|                   |                         |      |      |            |
|-------------------|-------------------------|------|------|------------|
| <b>HNM</b> s      | Dibromoacetonitrile     | DBAN | 0.05 | 122 ± 15   |
|                   | Bromochloroacetonitrile | BCAN | 0.01 | 110 ± 7.5  |
|                   | Iodoacetonitrile        | IAN  | 0.2  | 87 ± 7.8   |
|                   | Chloronitromethane      | CNM  | 0.01 | 92 ± 4.9   |
|                   | Trichloronitromethane   | TCNM | 0.01 | 85 ± 3.5   |
|                   | Bromochloronitromethane | BCNM | 0.1  | 94 ± 6.3   |
|                   | Tribromonitromethane    | TBNM | 0.3  | 98 ± 6.2   |
| Internal standars | Bromofluorobenzene      |      |      | 99 ± 3.7   |
|                   | 1,2-dibromopropane      |      |      | 105 ± 2.2  |
|                   | decafluorobiphenyl      |      |      | 113 ± 11.6 |

Table S2 Optimized instrumental and SRM conditions of HAAs.

| Retention time (min) | compound | Dwell time (s) | Precursor ion | Product ion | Cone Voltage (V) | Collision energy (eV) |
|----------------------|----------|----------------|---------------|-------------|------------------|-----------------------|
| 1.42                 | CAA      | 0.07           | 92.6          | 34.8        | 20               | 11                    |
| 1.58                 | BAA      | 0.05           | 136.7         | 78.5        | 20               | 10                    |
| 1.69                 | DCAA     | 0.05           | 126.6         | 82.6        | 20               | 10                    |
| 1.81                 | BCAA     | 0.05           | 172.7         | 128.7       | 20               | 9                     |
| 1.96                 | DBAA     | 0.05           | 216.8         | 172.8       | 20               | 11                    |
| 2.89                 | TCAA     | 0.05           | 160.6         | 116.6       | 15               | 8                     |
| 3.03                 | BDCAA    | 0.05           | 206.8         | 162.6       | 16               | 7                     |
| 3.15                 | CDBAA    | 0.10           | 250.8         | 206.7       | 15               | 7                     |
| 3.31                 | TBAA     | 0.08           | 249.0         | 78.5        | 30               | 20                    |

Table S3. DBPs measured in drinking water samples collected from 70 water treatment plants ( $\mu\text{g L}^{-1}$ ) and major water quality parameters.

| DBP           | 1 <sup>a</sup>  | 2           | 3            | 4           | 5            | 6           | 7           | 8           | 9           | 10          | 11          | 12           | 13          | 14          | 15          | 16           | 17          | 18          |
|---------------|-----------------|-------------|--------------|-------------|--------------|-------------|-------------|-------------|-------------|-------------|-------------|--------------|-------------|-------------|-------------|--------------|-------------|-------------|
| TCM           | 5.34            | 5.27        | 13.48        | 0.21        | 9.13         | 6.59        | 6.03        | 5.41        | 5.93        | 5.07        | 5.72        | 7.29         | 6.22        | 6.45        | 5.99        | 12.17        | 3.52        | 5.90        |
| BDCM          | 1.28            | 2.75        | 3.85         | 0.36        | 1.84         | 0.12        | 0.74        | 0.77        | 0.99        | 1.00        | 0.17        | 3.45         | 0.79        | 0.63        | 1.07        | 0.73         | 0.66        | 1.79        |
| DBCM          | ND <sup>b</sup> | 0.50        | 0.77         | 0.22        | 0.18         | 0.04        | 0.44        | 0.08        | 0.33        | 0.91        | 0.08        | 0.91         | 0.12        | 0.14        | 0.24        | 0.49         | 0.19        | 0.50        |
| TBM           | ND              | ND          | ND           | ND          | ND           | ND          | ND          | ND          | ND          | 0.16        | ND          | ND           | ND          | ND          | 0.12        | ND           | ND          | ND          |
| <b>THM4</b>   | <b>6.62</b>     | <b>8.52</b> | <b>18.10</b> | <b>0.79</b> | <b>11.15</b> | <b>6.75</b> | <b>7.21</b> | <b>6.27</b> | <b>7.25</b> | <b>7.14</b> | <b>5.97</b> | <b>11.65</b> | <b>7.12</b> | <b>7.22</b> | <b>7.41</b> | <b>13.39</b> | <b>4.37</b> | <b>8.19</b> |
| DCIM          | ND              | ND          | ND           | ND          | ND           | ND          | ND          | ND          | 0.46        | ND          | ND          | 0.26         | 0.53        | 0.48        | ND          | ND           | ND          | 0.71        |
| BCIM          | ND              | ND          | ND           | ND          | ND           | ND          | ND          | ND          | ND          | ND          | ND          | ND           | ND          | ND          | ND          | ND           | ND          | ND          |
| DBIM          | ND              | ND          | ND           | ND          | ND           | ND          | ND          | ND          | ND          | ND          | ND          | ND           | ND          | ND          | ND          | ND           | ND          | ND          |
| TIM           | ND              | ND          | ND           | ND          | ND           | ND          | ND          | ND          | ND          | ND          | ND          | ND           | ND          | ND          | ND          | ND           | ND          | ND          |
| <b>I-THMs</b> | <b>ND</b>       | <b>ND</b>   | <b>ND</b>    | <b>ND</b>   | <b>ND</b>    | <b>ND</b>   | <b>ND</b>   | <b>ND</b>   | <b>0.46</b> | <b>ND</b>   | <b>ND</b>   | <b>0.26</b>  | <b>0.53</b> | <b>0.48</b> | <b>ND</b>   | <b>ND</b>    | <b>ND</b>   | <b>0.71</b> |
| CAA           | ND              | ND          | ND           | ND          | ND           | ND          | ND          | ND          | ND          | ND          | ND          | ND           | ND          | ND          | ND          | ND           | ND          | ND          |
| DCAA          | 6.69            | ND          | 6.93         | 4.57        | 4.41         | 3.92        | 0.95        | 2.99        | 13.86       | 4.63        | 1.11        | 4.09         | ND          | 2.68        | 4.12        | 5.21         | 3.85        | 12.59       |



|                                                    |                 |                 |                 |                 |                 |                 |                    |                 |                 |                 |                 |                 |                    |                    |                 |                  |                 |                    |    |
|----------------------------------------------------|-----------------|-----------------|-----------------|-----------------|-----------------|-----------------|--------------------|-----------------|-----------------|-----------------|-----------------|-----------------|--------------------|--------------------|-----------------|------------------|-----------------|--------------------|----|
| IAN                                                | ND                 | ND              | ND              | ND              | ND              | ND              | ND                 | ND                 | ND              | ND               | ND              | ND                 | ND |
| <b>HANs</b>                                        | <b>0.30</b>     | <b>0.69</b>     | <b>0.07</b>     | <b>0.14</b>     | <b>0.54</b>     | <b>0.28</b>     | <b>0.17</b>        | <b>0.16</b>     | <b>0.95</b>     | <b>0.17</b>     | <b>0.15</b>     | <b>1.15</b>     | <b>0.34</b>        | <b>0.28</b>        | <b>0.19</b>     | <b>0.38</b>      | <b>0.58</b>     | <b>1.07</b>        |    |
| CNM                                                | ND              | 0.12            | 0.15            | 0.05            | 0.04            | 0.02            | 0.03               | 0.04            | 0.04            | 0.04            | 0.03            | 0.04            | 0.03               | 0.03               | 0.05            | 0.04             | ND              | 0.07               |    |
| TCNM                                               | ND                 | ND              | ND              | ND              | ND              | ND              | ND                 | ND                 | ND              | ND               | ND              | ND                 | ND |
| BCNM                                               | ND                 | ND              | ND              | ND              | ND              | ND              | ND                 | ND                 | ND              | ND               | ND              | ND                 | ND |
| TBNM                                               | ND                 | ND              | ND              | ND              | ND              | ND              | ND                 | ND                 | ND              | ND               | ND              | ND                 | ND |
| <b>HNM<sub>s</sub></b>                             | <b>ND</b>       | <b>0.12</b>     | <b>0.15</b>     | <b>0.05</b>     | <b>0.04</b>     | <b>0.02</b>     | <b>0.03</b>        | <b>0.04</b>     | <b>0.04</b>     | <b>0.04</b>     | <b>0.03</b>     | <b>0.04</b>     | <b>0.03</b>        | <b>0.03</b>        | <b>0.05</b>     | <b>0.04</b>      | <b>ND</b>       | <b>0.07</b>        |    |
| TOC (mg L <sup>-1</sup> )                          | 5.45            | 3.82            | - <sup>c</sup>  | -               | 2.20            | -               | 1.64               |                 | 2.97            | 1.06            | 2.49            | 1.63            | 2.47               | 2.28               | -               | -                | 1.61            | 2.41               |    |
| Br <sup>-</sup> (µg L <sup>-1</sup> )              | 2.95            | -               | -               | -               | 9.01            |                 | 19.08              |                 | 11.02           | 34.60           |                 | 19.38           | 10.04              | 7.58               |                 |                  | 10.53           | 23.53              |    |
| I <sup>-</sup> (µg L <sup>-1</sup> )               | ND              | -               | -               | -               | ND              |                 | ND                 |                 | ND              | ND              |                 | ND              | ND                 | ND                 |                 |                  | ND              | ND                 |    |
| NH <sub>4</sub> <sup>+</sup> (mg L <sup>-1</sup> ) | <0.01           | 0.18            | -               | -               | 0.19            | 0.13            | 0.82               | <0.02           | 0.02            | -               | -               | -               | 0.97               | 0.50               | 0.26            | -                | -               | 0.53               |    |
| disinfectant                                       | Cl <sub>2</sub> | NH <sub>2</sub> Cl | Cl <sub>2</sub> | NH <sub>2</sub> Cl | NH <sub>2</sub> Cl | Cl <sub>2</sub> | ClO <sub>2</sub> | Cl <sub>2</sub> | NH <sub>2</sub> Cl |    |
| SW <sup>f</sup> type                               | river              | river           | LR <sup>d</sup> | GW <sup>e</sup> | LR              | LR              | LR                 | LR                 | river           | river            | river           | river              |    |



| DBP           | 19          | 20          | 21          | 22          | 23          | 24          | 25           | 26          | 27          | 28          | 29          | 30          | 31          | 32          | 33           | 34           | 35           | 36           |
|---------------|-------------|-------------|-------------|-------------|-------------|-------------|--------------|-------------|-------------|-------------|-------------|-------------|-------------|-------------|--------------|--------------|--------------|--------------|
| TCM           | 6.56        | 4.92        | 4.42        | 4.36        | 6.55        | 7.04        | 9.59         | 6.96        | 7.03        | 8.49        | 5.80        | 8.95        | 4.08        | 0.89        | 7.42         | 8.75         | 5.83         | 10.31        |
| BDCM          | 1.15        | 0.12        | 0.88        | 1.34        | 1.53        | 0.60        | 0.97         | 0.46        | 0.44        | 0.07        | 0.55        | 0.69        | 1.42        | 1.32        | 2.55         | 1.93         | 2.45         | 6.30         |
| DBCM          | 0.61        | 0.40        | 0.43        | 1.10        | 0.52        | 0.50        | 0.40         | 0.23        | 0.17        | 0.03        | 0.18        | 0.26        | 1.06        | 0.73        | 7.76         | 3.35         | 0.98         | 2.12         |
| TBM           | 0.41        | 0.09        | 0.43        | 0.19        | ND          | ND          | ND           | ND          | ND          | ND          | ND          | ND          | 0.33        | 0.39        | 3.82         | 0.97         | 0.78         | 0.88         |
| <b>THM4</b>   | <b>8.72</b> | <b>5.53</b> | <b>6.16</b> | <b>6.99</b> | <b>8.60</b> | <b>8.14</b> | <b>10.96</b> | <b>7.65</b> | <b>7.63</b> | <b>8.59</b> | <b>6.53</b> | <b>9.90</b> | <b>6.89</b> | <b>3.33</b> | <b>21.56</b> | <b>14.99</b> | <b>10.03</b> | <b>19.62</b> |
| DCIM          | ND          | ND          | 1.30        | 0.44        | 1.27        | 1.24        | ND           | ND          | ND          | ND          | ND          | ND          | ND          | ND          | ND           | ND           | ND           | ND           |
| BCIM          | ND           | ND          | ND          | ND          | ND          | ND          | ND          | ND          | ND           | ND           | ND           | ND           |
| DBIM          | ND           | ND          | ND          | ND          | ND          | ND          | ND          | ND          | ND           | ND           | ND           | ND           |
| TIM           | ND           | ND          | ND          | ND          | ND          | ND          | ND          | ND          | ND           | ND           | ND           | ND           |
| <b>I-THMs</b> | <b>ND</b>   | <b>ND</b>   | <b>1.30</b> | <b>0.44</b> | <b>1.27</b> | <b>1.24</b> | <b>ND</b>    | <b>ND</b>   | <b>ND</b>   | <b>ND</b>   | <b>ND</b>   | <b>ND</b>   | <b>ND</b>   | <b>ND</b>   | <b>ND</b>    | <b>ND</b>    | <b>ND</b>    | <b>ND</b>    |
| CAA           | ND           | ND          | ND          | ND          | ND          | ND          | ND          | ND          | ND           | ND           | ND           | ND           |
| DCAA          | 1.15        | 9.66        | 8.82        | 3.78        | 10.04       | 52.85       | 9.66         | 3.66        | 6.66        | 10.91       | 8.33        | 8.11        | 3.95        | 1.38        | 2.95         | 3.71         | 3.58         | 3.45         |
| TCAA          | 2.55        | ND          | 6.79        | 2.23        | 10.12       | 6.79        | 5.14         | 3.18        | 4.46        | 7.11        | 11.19       | 12.12       | 1.65        | 1.12        | 2.49         | 4.59         | 3.94         | 2.55         |



|                                                    |                 |                  |                 |                 |                 |                 |                 |                 |                 |                 |                 |                 |                 |                 |                 |                 |                    |                 |                 |
|----------------------------------------------------|-----------------|------------------|-----------------|-----------------|-----------------|-----------------|-----------------|-----------------|-----------------|-----------------|-----------------|-----------------|-----------------|-----------------|-----------------|-----------------|--------------------|-----------------|-----------------|
| <b>HANs</b>                                        | <b>0.86</b>     | <b>0.65</b>      | <b>1.94</b>     | <b>0.76</b>     | <b>1.31</b>     | <b>0.77</b>     | <b>6.08</b>     | <b>4.37</b>     | <b>1.56</b>     | <b>1.13</b>     | <b>0.20</b>     | <b>2.66</b>     | <b>0.97</b>     | <b>1.38</b>     | <b>1.07</b>     | <b>1.75</b>     | <b>ND</b>          | <b>4.60</b>     |                 |
| CNM                                                | ND              | ND               | 0.06            | 0.02            | 0.07            | 0.01            | 0.06            | ND              | 0.07            | ND              | 0.11            | 0.07            | 0.03            | 0.11            | 0.05            | 0.09            | 0.96               | 0.05            |                 |
| TCNM                                               | ND              | ND               | ND              | ND              | ND              | ND              | ND              | ND              | ND              | ND              | ND              | ND              | ND              | ND              | ND              | ND              | ND                 | ND              |                 |
| BCNM                                               | ND              | ND               | ND              | ND              | ND              | ND              | ND              | ND              | ND              | ND              | ND              | ND              | ND              | ND              | ND              | ND              | ND                 | ND              |                 |
| TBNM                                               | ND              | ND               | ND              | ND              | ND              | ND              | ND              | ND              | ND              | ND              | ND              | ND              | ND              | ND              | ND              | ND              | ND                 | ND              |                 |
| <b>HNM<sub>s</sub></b>                             | <b>ND</b>       | <b>ND</b>        | <b>0.06</b>     | <b>0.02</b>     | <b>0.07</b>     | <b>0.01</b>     | <b>0.06</b>     | <b>ND</b>       | <b>0.07</b>     | <b>ND</b>       | <b>0.11</b>     | <b>0.07</b>     | <b>0.03</b>     | <b>0.11</b>     | <b>0.05</b>     | <b>0.09</b>     | <b>0.96</b>        | <b>0.05</b>     |                 |
| TOC (mg L <sup>-1</sup> )                          | 1.70            | 2.19             | 2.16            | 2.28            | 2.17            | 2.23            | 2.02            | 2.67            | -               | 2.11            | 1.98            | -               | 3.10            | 5.30            | 2.53            | 2.38            | 2.28               | 2.28            |                 |
| Br <sup>-</sup> (µg L <sup>-1</sup> )              | 30.29           | 28.12            | 9.83            | -               | 22.76           | 13.39           | 14.53           | 10.38           | -               | 3.88            | 16.40           | -               | ND              | 242.50          | 139.88          | 103.46          | 26.95              | 23.77           |                 |
| I <sup>-</sup> (µg L <sup>-1</sup> )               | ND              | ND               | ND              | -               | ND              | ND              | ND              | ND              | -               | ND              | ND              | -               | ND              | ND              | ND              | ND              | ND                 | ND              |                 |
| NH <sub>4</sub> <sup>+</sup> (mg L <sup>-1</sup> ) | 0.05            | 0.07             | -               | -               | -               | -               | -               | -               | -               | <0.04           | <0.04           | <0.04           | -               | 0.08            | 0.08            | 1.20            | 0.14               | 0.25            |                 |
| disinfectant                                       | Cl <sub>2</sub> | ClO <sub>2</sub> | Cl <sub>2</sub> | NH <sub>2</sub> Cl | Cl <sub>2</sub> | Cl <sub>2</sub> |
| SW type                                            | river           | LR               | LR              | LR              | LR              | LR              | river           | river           | river           | LR              | river           | river           | river           | river           | river           | river           | LR                 | river           | river           |

| DBP           | 37           | 38           | 39           | 40          | 41          | 42           | 43           | 44            | 45           | 46           | 47           | 48           | 49          | 50           | 51          | 52           | 53           | 54           |
|---------------|--------------|--------------|--------------|-------------|-------------|--------------|--------------|---------------|--------------|--------------|--------------|--------------|-------------|--------------|-------------|--------------|--------------|--------------|
| TCM           | 5.67         | 15.39        | 12.45        | 5.52        | 5.45        | 15.98        | 21.34        | 24.60         | 10.37        | 5.89         | 5.47         | 2.80         | 0.61        | 3.66         | 1.59        | 3.94         | 11.30        | 13.60        |
| BDCM          | 2.90         | 2.11         | 3.37         | 0.87        | 0.17        | 5.50         | 9.14         | 7.76          | 15.35        | 8.72         | 10.28        | 7.73         | 1.52        | 7.71         | 1.37        | 17.02        | 2.13         | 4.58         |
| DBCM          | 0.99         | 0.35         | 0.49         | ND          | 0.10        | 0.62         | 2.49         | 1.20          | 13.41        | 6.40         | 5.95         | 5.90         | 2.41        | 10.76        | 2.33        | 18.80        | 0.24         | ND           |
| TBM           | 0.53         | 0.41         | 0.30         | ND          | ND          | 3.46         | 9.14         | 73.47         | 3.76         | 0.97         | 0.91         | ND           | 5.31        | 5.19         | 1.58        | 6.97         | 26.91        | ND           |
| <b>THM4</b>   | <b>10.10</b> | <b>18.26</b> | <b>16.62</b> | <b>6.39</b> | <b>5.73</b> | <b>25.58</b> | <b>42.11</b> | <b>107.03</b> | <b>42.89</b> | <b>21.98</b> | <b>22.61</b> | <b>16.42</b> | <b>9.85</b> | <b>27.32</b> | <b>6.87</b> | <b>46.73</b> | <b>40.58</b> | <b>18.18</b> |
| DCIM          | ND           | ND           | ND           | ND          | ND          | 0.62         | 1.01         | 1.20          | 1.37         | ND           | 0.74         | 0.51         | ND          | 1.94         | ND          | 3.67         | ND           | ND           |
| BCIM          | ND           | ND           | ND           | ND          | ND          | 0.68         | ND           | 1.75          | ND           | ND           | ND           | ND           | ND          | ND           | ND          | 1.91         | ND           | ND           |
| DBIM          | ND           | ND           | ND           | ND          | ND          | ND           | ND           | ND            | ND           | ND           | ND           | ND           | ND          | ND           | ND          | ND           | ND           | ND           |
| TIM           | ND           | ND           | ND           | ND          | ND          | ND           | ND           | ND            | ND           | ND           | ND           | ND           | ND          | ND           | ND          | ND           | ND           | ND           |
| <b>I-THMs</b> | <b>ND</b>    | <b>ND</b>    | <b>ND</b>    | <b>ND</b>   | <b>ND</b>   | <b>1.31</b>  | <b>1.01</b>  | <b>2.95</b>   | <b>1.37</b>  | <b>ND</b>    | <b>0.74</b>  | <b>0.51</b>  | <b>ND</b>   | <b>1.94</b>  | <b>ND</b>   | <b>5.58</b>  | <b>ND</b>    | <b>ND</b>    |
| CAA           | ND           | ND           | ND           | ND          | ND          | ND           | ND           | ND            | ND           | ND           | ND           | ND           | ND          | ND           | ND          | ND           | ND           | ND           |
| DCAA          | 2.01         | ND           | 6.05         | 2.00        | 2.76        | 3.44         | 3.90         | 3.64          | 4.90         | 4.82         | 10.64        | 6.71         | 3.51        | 1.53         | ND          | 3.80         | 20.13        | 16.76        |
| TCAA          | 2.35         | 9.84         | 7.25         | ND          | ND          | 7.59         | 6.96         | 7.01          | 6.27         | 2.89         | 5.91         | 5.31         | 4.16        | ND           | ND          | ND           | 4.91         | 5.36         |

|             |             |             |              |             |             |              |              |              |              |              |              |              |              |             |             |              |              |              |    |
|-------------|-------------|-------------|--------------|-------------|-------------|--------------|--------------|--------------|--------------|--------------|--------------|--------------|--------------|-------------|-------------|--------------|--------------|--------------|----|
| BAA         | ND          | ND          | ND           | ND          | ND          | ND           | ND           | ND           | ND           | ND           | ND           | ND           | ND           | ND          | ND          | ND           | ND           | ND           | ND |
| BCAA        | ND          | ND          | 1.96         | 2.24        | ND          | ND           | 2.57         | ND           | ND           | 2.32         | 3.15         | 3.82         | 2.35         | 1.53        | 1.83        | 3.03         | ND           | ND           |    |
| DBAA        | ND          | ND          | ND           | ND          | ND          | ND           | ND           | ND           | ND           | 1.26         | 2.77         | 2.83         | 1.71         | 2.33        | 2.41        | 2.87         | 3.32         | ND           | ND |
| DCBAA       | ND          | ND          | ND           | ND          | ND          | ND           | ND           | ND           | ND           | ND           | ND           | ND           | 3.13         | ND          | ND          | ND           | 3.38         | ND           | ND |
| DBCBA       | ND          | ND          | ND           | ND          | ND          | ND           | ND           | ND           | ND           | ND           | ND           | ND           | 4.83         | ND          | ND          | ND           | 4.09         | ND           | ND |
| TBAA        | ND          | ND          | ND           | ND          | ND          | ND           | ND           | ND           | ND           | ND           | ND           | ND           | ND           | ND          | ND          | ND           | ND           | ND           | ND |
| <b>HAAs</b> | <b>4.36</b> | <b>9.84</b> | <b>15.27</b> | <b>4.24</b> | <b>2.76</b> | <b>11.03</b> | <b>13.43</b> | <b>10.65</b> | <b>12.43</b> | <b>12.80</b> | <b>22.53</b> | <b>25.51</b> | <b>12.35</b> | <b>5.47</b> | <b>4.70</b> | <b>17.62</b> | <b>25.05</b> | <b>22.12</b> |    |
| CAN         | 0.13        | ND          | 0.05         | ND          | ND          | ND           | ND           | ND           | 0.18         | 0.07         | ND           | ND           | ND           | ND          | 0.14        | 0.29         | ND           | ND           |    |
| DCAN        | 0.90        | 2.92        | 2.23         | 0.70        | 0.15        | 4.02         | 6.66         | 6.16         | 2.73         | 1.26         | 1.98         | 1.46         | 0.15         | 1.14        | 0.50        | 1.89         | ND           | 0.06         |    |
| TCAN        | ND          | ND          | ND           | ND          | ND          | 0.17         | ND           | 0.36         | 0.25         | ND           | ND           | ND           | 0.11         | 0.15        | 0.16        | 0.05         | ND           | 0.97         |    |
| BAN         | ND          | ND          | ND           | ND          | 0.07        | 0.01         | ND           | 0.06         | ND           | ND           | ND           | ND           | ND           | 0.11        | 0.07        | 0.16         | ND           | 0.07         |    |
| BCAN        | ND          | 1.57        | 0.99         | ND          | ND          | 1.31         | 6.57         | 2.25         | 6.70         | 1.25         | 1.50         | 1.57         | ND           | 3.61        | ND          | 4.43         | ND           | ND           |    |
| DBAN        | ND          | ND          | ND           | ND          | ND          | ND           | ND           | ND           | 2.63         | ND           | ND           | ND           | ND           | ND          | ND          | 4.08         | ND           | ND           |    |
| IAN         | ND          | ND          | ND           | ND          | ND          | ND           | ND           | 0.2          | ND           | ND           | ND           | ND           | ND           | ND          | ND          | 0.86         | ND           | ND           |    |

|                                                    |                 |                 |                 |                 |                    |                 |                 |                 |                 |                 |                 |                 |                    |                 |                 |                  |                 |                 |
|----------------------------------------------------|-----------------|-----------------|-----------------|-----------------|--------------------|-----------------|-----------------|-----------------|-----------------|-----------------|-----------------|-----------------|--------------------|-----------------|-----------------|------------------|-----------------|-----------------|
| <b>HANs</b>                                        | <b>1.03</b>     | <b>4.49</b>     | <b>3.27</b>     | <b>0.70</b>     | <b>0.23</b>        | <b>5.68</b>     | <b>13.24</b>    | <b>8.99</b>     | <b>12.48</b>    | <b>2.58</b>     | <b>3.48</b>     | <b>3.03</b>     | <b>0.25</b>        | <b>5.00</b>     | <b>0.87</b>     | <b>11.77</b>     | <b>0.00</b>     | <b>1.09</b>     |
| CNM                                                | 0.08            | 0.05            | 0.02            | ND              | 0.06               | ND              | ND              | ND              | 0.77            | 0.27            | 0.26            | 0.32            | 0.05               | 0.28            | 0.39            | 0.81             | 0.17            | 0.13            |
| TCNM                                               | ND              | ND              | ND              | ND              | ND                 | ND              | ND              | ND              | ND              | ND              | 0.28            | 0.11            | ND                 | ND              | ND              | 0.11             | ND              | ND              |
| BCNM                                               | ND              | ND              | ND              | ND              | ND                 | ND              | ND              | ND              | ND              | ND              | ND              | ND              | ND                 | ND              | ND              | ND               | ND              | ND              |
| TBNM                                               | ND              | ND              | ND              | ND              | ND                 | ND              | ND              | ND              | ND              | ND              | ND              | ND              | ND                 | ND              | ND              | ND               | ND              | ND              |
| <b>HNM</b> s                                       | <b>0.08</b>     | <b>0.05</b>     | <b>0.02</b>     | <b>ND</b>       | <b>0.06</b>        | <b>ND</b>       | <b>ND</b>       | <b>ND</b>       | <b>0.77</b>     | <b>0.27</b>     | <b>0.54</b>     | <b>0.42</b>     | <b>0.05</b>        | <b>0.28</b>     | <b>0.39</b>     | <b>0.92</b>      | <b>0.17</b>     | <b>0.13</b>     |
| TOC (mg L <sup>-1</sup> )                          | -               | 3.20            | -               | 1.74            | 2.37               | 2.07            | 1.98            | -               | 2.62            | 2.35            | 2.28            | -               | 3.14               | 2.55            | -               | 3.15             | -               | 1.37            |
| Br <sup>-</sup> (µg L <sup>-1</sup> )              | -               | 42.85           | -               | 18.57           | 10.36              | 12.21           | 27.30           | -               | ND              | ND              | ND              | -               | ND                 | ND              | -               | ND               | -               | 17.10           |
| I <sup>-</sup> (µg L <sup>-1</sup> )               | -               | ND              | -               | ND              | ND                 | ND              | ND              | -               | ND              | ND              | ND              | -               | ND                 | ND              | -               | ND               | -               | ND              |
| NH <sub>4</sub> <sup>+</sup> (mg L <sup>-1</sup> ) | 0.10            | 0.21            | 0.21            | 0.08            | 2.43               | -               | -               | -               | 0.10            | -               | <0.02           | 0.61            | 0.34               | 0.05            | 0.18            | 0.14             | 0.20            | 0.23            |
| disinfectant                                       | Cl <sub>2</sub> | Cl <sub>2</sub> | Cl <sub>2</sub> | Cl <sub>2</sub> | NH <sub>2</sub> Cl | Cl <sub>2</sub> | NH <sub>2</sub> Cl | Cl <sub>2</sub> | Cl <sub>2</sub> | ClO <sub>2</sub> | Cl <sub>2</sub> | Cl <sub>2</sub> |
| SW type                                            | river           | LR              | LR              | LR              | river              | river           | river           | river           | river           | river           | LR              | LR              | LR                 | LR              | LR              | LR               | river           | river           |

| <b>DBP</b>    | <b>55</b>    | <b>56</b>   | <b>57</b>    | <b>58</b>   | <b>59</b>    | <b>60</b>    | <b>61</b>    | <b>62</b>    | <b>63</b>    | <b>64</b>    | <b>65</b>    | <b>66</b>    | <b>67</b>    | <b>68</b>    | <b>69</b>    | <b>70</b>    |
|---------------|--------------|-------------|--------------|-------------|--------------|--------------|--------------|--------------|--------------|--------------|--------------|--------------|--------------|--------------|--------------|--------------|
| TCM           | 3.14         | 2.90        | 15.95        | 2.83        | 14.80        | 13.29        | 27.58        | 27.64        | 37.72        | 15.67        | 14.63        | 9.99         | 12.88        | 2.78         | 5.82         | 10.01        |
| BDCM          | 6.10         | 1.16        | 31.00        | 0.52        | 7.13         | 10.75        | 10.09        | 16.03        | 11.40        | 1.98         | 27.81        | 19.32        | 21.25        | 3.67         | 7.73         | 9.66         |
| DBCM          | 7.50         | 2.22        | 27.56        | 0.80        | 2.34         | 4.40         | 2.04         | ND           | 2.47         | 0.20         | 21.41        | 17.87        | 19.11        | 6.08         | 9.68         | 5.17         |
| TBM           | 1.77         | 1.01        | 5.52         | 0.40        | ND           | 0.30         | ND           | 0.31         | 0.63         | ND           | 3.17         | 2.84         | 3.40         | ND           | 2.91         | 0.89         |
| <b>THM4</b>   | <b>18.51</b> | <b>7.28</b> | <b>80.03</b> | <b>4.56</b> | <b>24.27</b> | <b>28.74</b> | <b>39.71</b> | <b>43.98</b> | <b>52.22</b> | <b>17.85</b> | <b>67.03</b> | <b>50.02</b> | <b>56.65</b> | <b>12.54</b> | <b>26.15</b> | <b>25.73</b> |
| DCIM          | ND           | ND          | 1.21         | ND          | ND           | 0.71         | 1.01         | ND           | 2.00         | ND           | ND           | ND           | ND           | ND           | ND           | 0.60         |
| BCIM          | ND           | ND          | ND           | ND          | ND           | ND           | ND           | ND           | ND           | ND           | ND           | ND           | ND           | ND           | ND           | ND           |
| DBIM          | ND           | ND          | ND           | ND          | ND           | ND           | ND           | ND           | ND           | ND           | ND           | ND           | ND           | ND           | ND           | ND           |
| TIM           | ND           | ND          | ND           | ND          | ND           | ND           | ND           | ND           | ND           | ND           | ND           | ND           | ND           | ND           | ND           | ND           |
| <b>I-THMs</b> | <b>ND</b>    | <b>ND</b>   | <b>1.21</b>  | <b>ND</b>   | <b>ND</b>    | <b>0.71</b>  | <b>1.01</b>  | <b>ND</b>    | <b>2.00</b>  | <b>ND</b>    | <b>ND</b>    | <b>ND</b>    | <b>ND</b>    | <b>ND</b>    | <b>ND</b>    | <b>0.60</b>  |
| CAA           | ND           | ND          | ND           | ND          | ND           | ND           | ND           | ND           | ND           | ND           | ND           | ND           | ND           | ND           | ND           | ND           |
| DCAA          | 2.84         | 2.20        | 3.89         | 6.86        | 5.48         | 3.59         | 9.44         | 4.88         | 15.62        | 7.71         | 0.00         | 7.31         | 7.93         | 0.45         | 2.11         | ND           |
| TCAA          | 1.29         | ND          | 3.39         | 4.38        | 3.75         | 2.13         | 10.12        | 9.70         | 16.33        | 6.64         | 7.31         | 4.33         | 6.50         | ND           | 1.59         | 1.25         |





|                                                    |                 |                 |                 |                 |                 |                 |                 |                 |                 |                 |                 |                 |                 |                 |                 |                 |
|----------------------------------------------------|-----------------|-----------------|-----------------|-----------------|-----------------|-----------------|-----------------|-----------------|-----------------|-----------------|-----------------|-----------------|-----------------|-----------------|-----------------|-----------------|
| <b>HANs</b>                                        | <b>0.51</b>     | <b>0.79</b>     | <b>5.48</b>     | <b>0.76</b>     | <b>3.98</b>     | <b>2.95</b>     | <b>14.66</b>    | <b>22.84</b>    | <b>4.46</b>     | <b>6.91</b>     | <b>27.50</b>    | <b>39.20</b>    | <b>18.36</b>    | <b>2.32</b>     | <b>21.53</b>    | <b>2.64</b>     |
| CNM                                                | 0.07            | 0.06            | 0.18            | ND              | 0.18            | 0.15            | 0.25            | ND              | 0.02            | ND              | 0.26            | 0.24            | 0.37            | ND              | 0.07            | 0.03            |
| TCNM                                               | ND              | ND              | ND              | ND              | ND              | 0.07            | ND              | 0.02            | ND              |
| BCNM                                               | ND              |
| TBNM                                               | ND              |
| <b>HNMs</b>                                        | <b>0.07</b>     | <b>0.06</b>     | <b>0.18</b>     | <b>ND</b>       | <b>0.18</b>     | <b>0.21</b>     | <b>0.25</b>     | <b>ND</b>       | <b>0.02</b>     | <b>ND</b>       | <b>0.26</b>     | <b>0.24</b>     | <b>0.37</b>     | <b>ND</b>       | <b>0.09</b>     | <b>0.03</b>     |
| TOC (mg L <sup>-1</sup> )                          | 0.87            | -               | 2.28            | 2.45            | 3.65            | -               | 4.01            | 4.51            | -               | 2.52            | 3.08            | -               | -               | -               | 2.86            | 2.46            |
| Br <sup>-</sup> (μg L <sup>-1</sup> )              | 46.77           | -               | -               | 49.10           | -               | -               | 16.49           | 46.88           | -               | 27.48           | -               | -               | -               | -               | 44.04           | 23.83           |
| I <sup>-</sup> (μg L <sup>-1</sup> )               | ND              | -               | -               | ND              | -               | -               | ND              | ND              | -               | ND              | -               | -               | -               | -               | ND              | ND              |
| NH <sub>4</sub> <sup>+</sup> (mg L <sup>-1</sup> ) | -               | -               | -               | -               | -               | -               | <0.02           | <0.02           | <0.02           | 0.08            | 0.06            | 0.08            | 0.07            | -               | -               | -               |
| disinfectant                                       | Cl <sub>2</sub> |
| SW type                                            | LR              | GW              | GW              | GW              | LR              | LR              |

<sup>a</sup> the number of the water treatment plant. <sup>b</sup> not detected. <sup>c</sup> not measured. <sup>d</sup> Lake and Reservoir. <sup>e</sup> Groundwater. <sup>f</sup> source water

TOC, Br<sup>-</sup>, I<sup>-</sup>, and NH<sub>4</sub><sup>+</sup> were all detected in source water of the drinking water treatments.

Table S4. Concentrations of selected DBPs and their abundant species in drinking water samples of China ( $\mu\text{g L}^{-1}$ ).

| <b>parameter</b> | <b>minimun</b> | <b>median</b> | <b>75th percentile</b> | <b>maximum</b> |
|------------------|----------------|---------------|------------------------|----------------|
| THM4             | 0.79           | 10.53         | 23.86                  | 107.03         |
| I-THMs           | ND             | ND            | 0.50                   | 5.58           |
| HAAs             | 0.45           | 10.95         | 17.79                  | 59.64          |
| DCAA             | ND             | 3.93          | 7.21                   | 52.85          |
| TCAA             | ND             | 3.97          | 6.91                   | 16.33          |
| HANs             | ND             | 1.11          | 4.44                   | 39.20          |
| DCAN             | ND             | 0.63          | 1.69                   | 6.66           |
| HNM <sub>s</sub> | ND             | 0.05          | 0.12                   | 0.96           |
| CNM              | ND             | 0.05          | 0.12                   | 0.96           |
| TCNM             | ND             | ND            | ND                     | 0.28           |

Table S5. The CHO toxic data of THMs from pervious study.<sup>1-3</sup>

| Chemical | CHO genotoxic potency (M) | CHO cytotoxicity %C <sub>1/2</sub> value (M) |
|----------|---------------------------|----------------------------------------------|
| TIM      | NS                        | $6.60 \times 10^{-5}$                        |
| DBIM     | NS                        | $1.90 \times 10^{-3}$                        |
| DCIM     | NS                        | $4.13 \times 10^{-3}$                        |
| BCIM     | NS                        | $2.40 \times 10^{-3}$                        |
| TCM      | NS                        | $9.63 \times 10^{-3}$                        |
| BDCM     | NS                        | $1.12 \times 10^{-2}$                        |
| DBCM     | NS                        | $5.7 \times 10^{-3}$                         |
| TBM      | NS                        | $3.96 \times 10^{-3}$                        |

THM4: The unit of genotoxicity index value =NS

The unit of cytotoxicity index value =  $1.3 \times 10^2$

I-THMs: The unit of genotoxicity index value = NS

The unit of cytotoxicity index value =  $1.3 \times 10^3$

Table S6. The CHO toxic data of HAAs from previous study.<sup>1,4</sup>

| Chemical | CHO genotoxic potency (M) | CHO cytotoxicity %C <sub>1/2</sub> value (M) |
|----------|---------------------------|----------------------------------------------|
| BAA      | $1.7 \times 10^{-5}$      | $8.9 \times 10^{-6}$                         |
| DBAA     | $1.756 \times 10^{-3}$    | $5.0 \times 10^{-4}$                         |
| TBAA     | $2.456 \times 10^{-3}$    | $1.0 \times 10^{-3}$                         |
| CAA      | $4.1 \times 10^{-4}$      | $9.4 \times 10^{-4}$                         |
| DCAA     | NS                        | $1.14 \times 10^{-2}$                        |
| TCAA     | NS                        | $1.75 \times 10^{-2}$                        |

HAAs: The unit of genotoxicity index value =  $4.7 \times 10^2$

The unit of cytotoxicity index value =  $1.03 \times 10^3$

Table S7. The CHO toxic data of HANs from previous study.<sup>5</sup>

| Chemical | CHO genotoxic potency (M) | CHO cytotoxicity % C <sub>1/2</sub> value (M) |
|----------|---------------------------|-----------------------------------------------|
| IAN      | $3.71 \times 10^{-5}$     | $3.30 \times 10^{-6}$                         |
| BAN      | $3.85 \times 10^{-5}$     | $3.21 \times 10^{-6}$                         |
| DBAN     | $4.71 \times 10^{-5}$     | $2.85 \times 10^{-6}$                         |
| BCAN     | $3.24 \times 10^{-4}$     | $8.46 \times 10^{-6}$                         |
| CAN      | $6.01 \times 10^{-4}$     | $6.83 \times 10^{-5}$                         |
| DCAN     | $2.75 \times 10^{-4}$     | $5.73 \times 10^{-5}$                         |
| TCAN     | $1.01 \times 10^{-3}$     | $1.60 \times 10^{-4}$                         |

HANs: The unit of genotoxicity index value =  $3.6 \times 10^3$

The unit of cytotoxicity index value =  $1.2 \times 10^5$

Table S8. The CHO toxic data of HNMs from previous study.<sup>6</sup>

| Chemical | CHO genotoxic potency (M) | CHO cytotoxicity %C ½ value (M) |
|----------|---------------------------|---------------------------------|
| TBNM     | $6.99 \times 10^{-5}$     | $8.57 \times 10^{-6}$           |
| CNM      | $2.15 \times 10^{-3}$     | $5.29 \times 10^{-4}$           |
| TCNM     | $9.34 \times 10^{-5}$     | $5.36 \times 10^{-4}$           |
| BCNM     | $1.65 \times 10^{-4}$     | $4.05 \times 10^{-5}$           |

HANs: The unit of genotoxicity index value =  $1.0 \times 10^4$

The unit of cytotoxicity index value =  $3.5 \times 10^3$

## Reference:

1. M. J. Plewa, Y. Kargalioglu, D. Vankerk, R. A. Minear and E. D. Wagner, *Environmental and Molecular Mutagenesis*, 2002, **40**, 134-142.
2. S. D. Richardson, *Trac-Trends in Analytical Chemistry*, 2003, **22**, 666-684.
3. M. J. Plewa, E. D. Wagner, M. G. Muellner, K.-M. Hsu and S. D. Richardson, in *Disinfection by-Products in Drinking Water: Occurrence, Formation, Health Effects, and Control*, eds. T. Karanfil, S. W. Krasner and Y. Xie, Editon edn., 2008, vol. 995, pp. 36-50.
4. M. J. Plewa, J. E. Simmons, S. D. Richardson and E. D. Wagner, *Environmental and Molecular Mutagenesis*, 2010, **51**, 871-878.
5. M. G. Muellner, E. D. Wagner, K. McCalla, S. D. Richardson, Y. T. Woo and M. J. Plewa, *Environmental Science & Technology*, 2007, **41**, 645-651.
6. M. J. Plewa, E. D. Wagner, P. Jazwierska, S. D. Richardson, P. H. Chen and A. B. McKague, *Environmental Science & Technology*, 2004, **38**, 62-68.
